# Supplementary material
Source: PubMed Central journal article supplement (PMC5892142)

S1. Patient 1

**Superior**

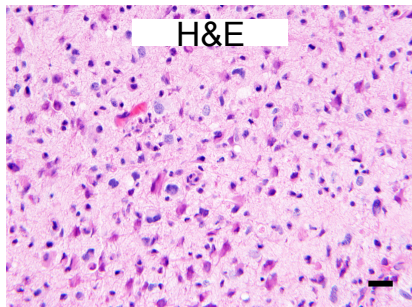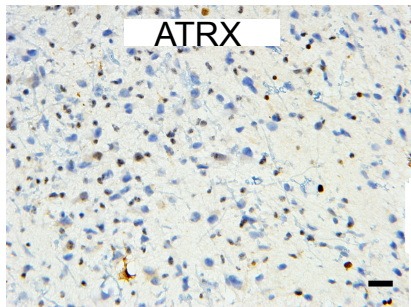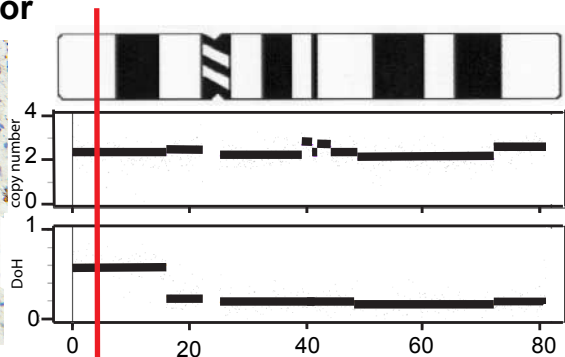

**Inferior**

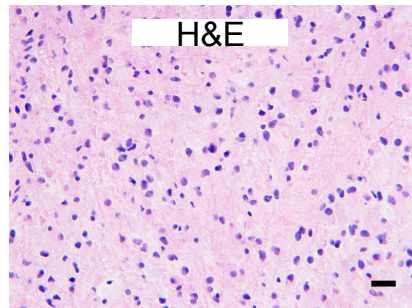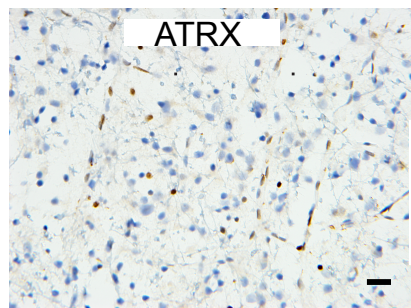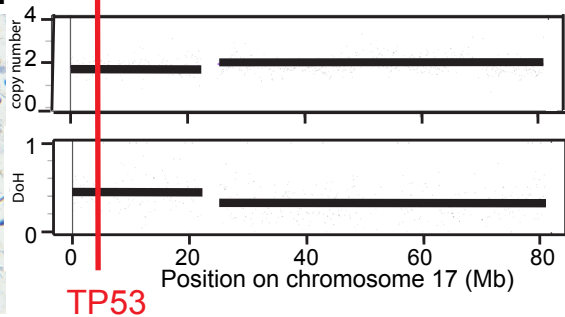

**TP53**

S2. Patient 2

Patient 2 chromosome 17 LOH

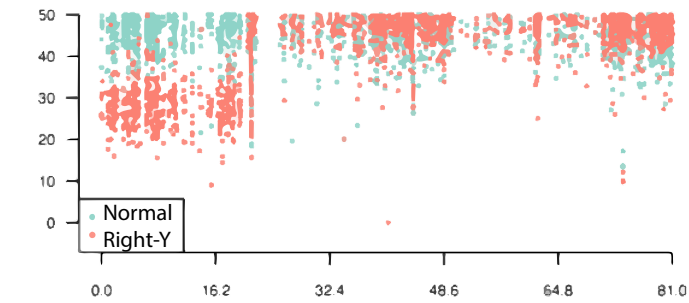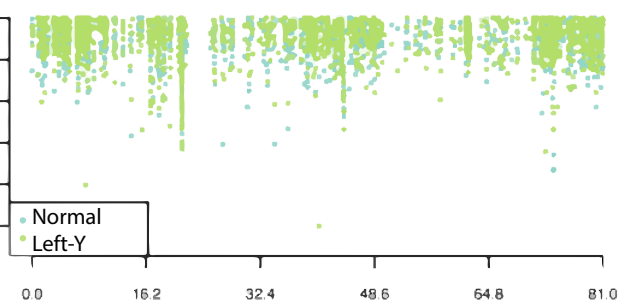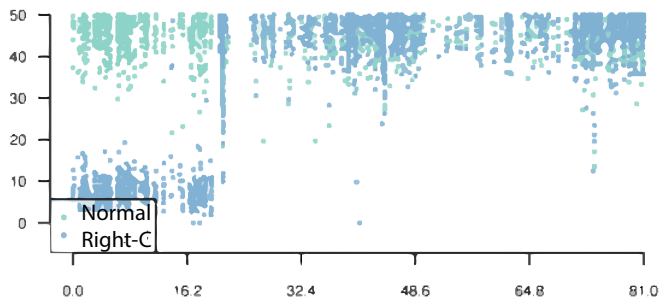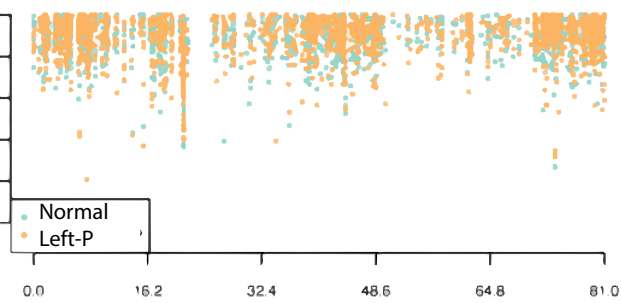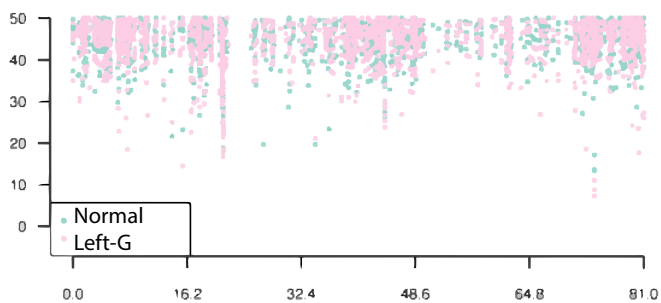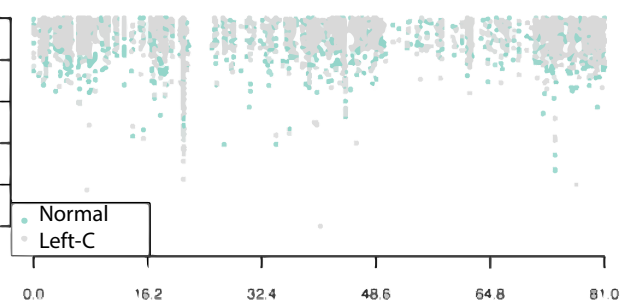

S3

ADC map

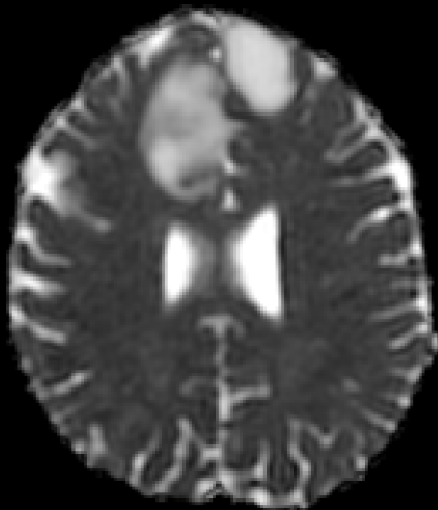

T2 FLAIR

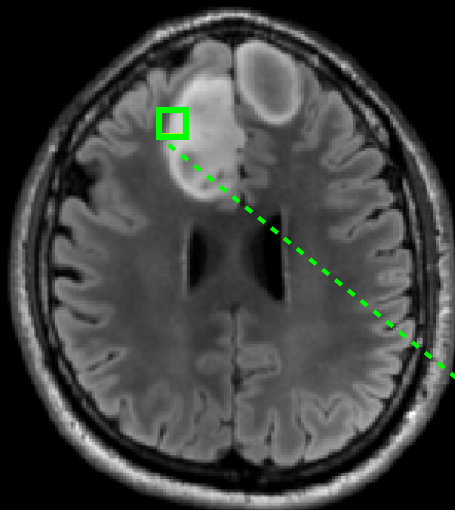

MRSI

1st surgery

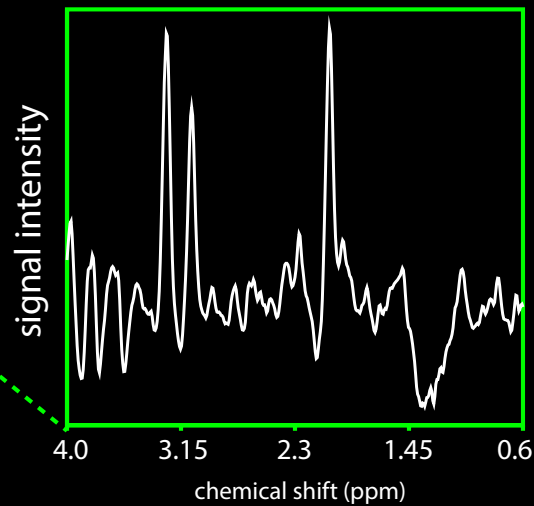

PH map

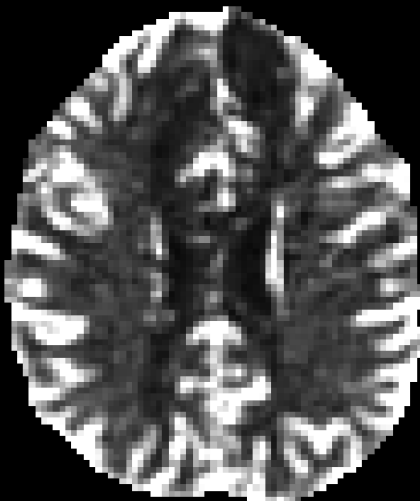

T1 + Gd

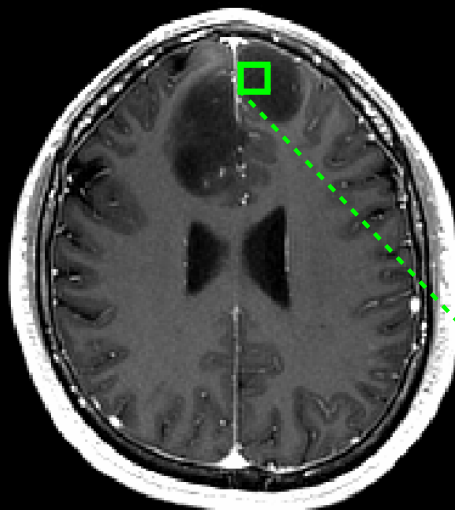

2nd surgery

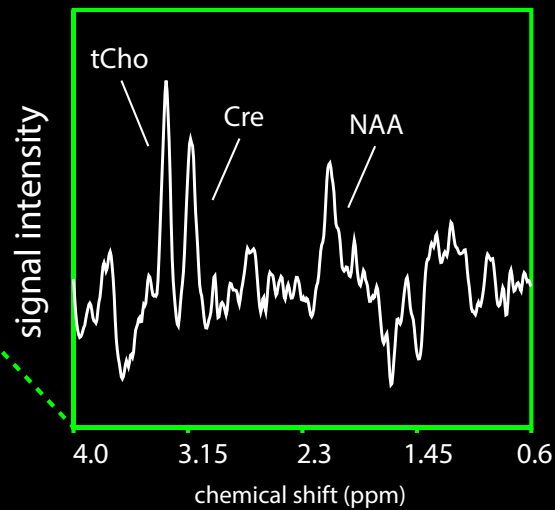

S4. Patient 3.

Copy number of chr 1 and chr 19 compared to whole blood (WES)

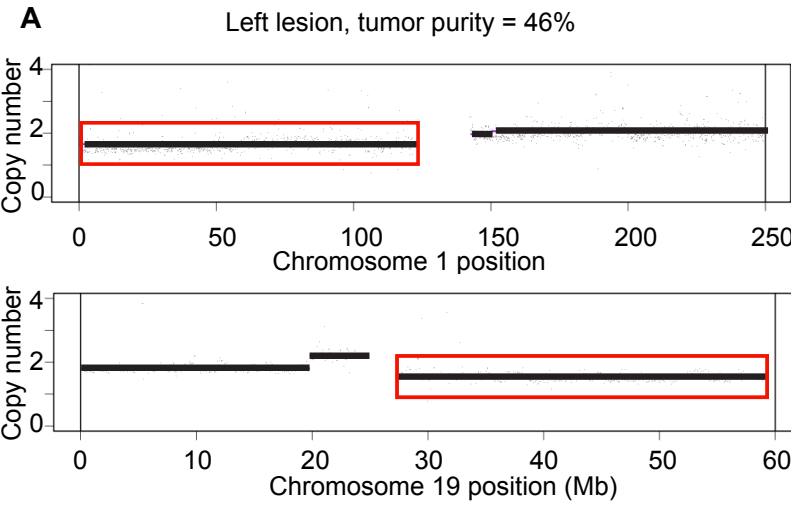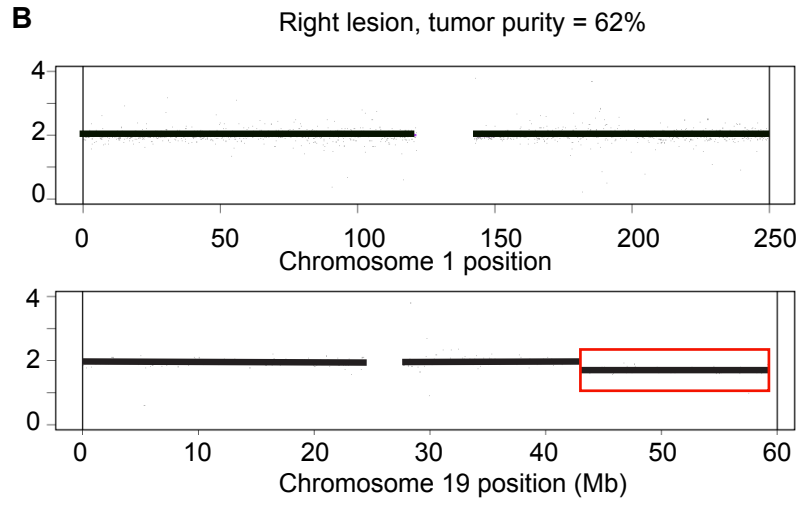

Sanger sequencing of the *TERT*-p mutation

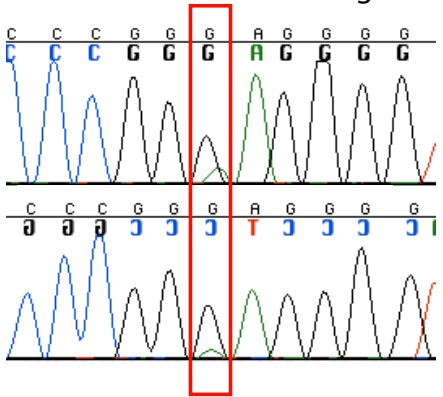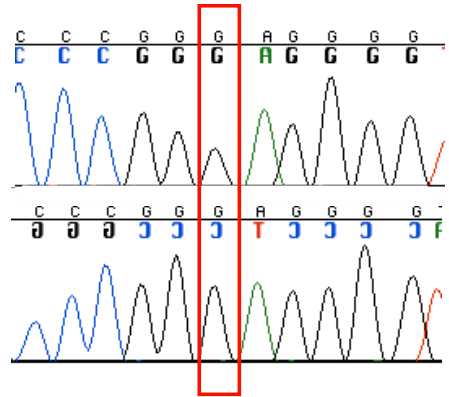



S5. Patient 3

Copy number inferred from exome sequencing for all chromosomes

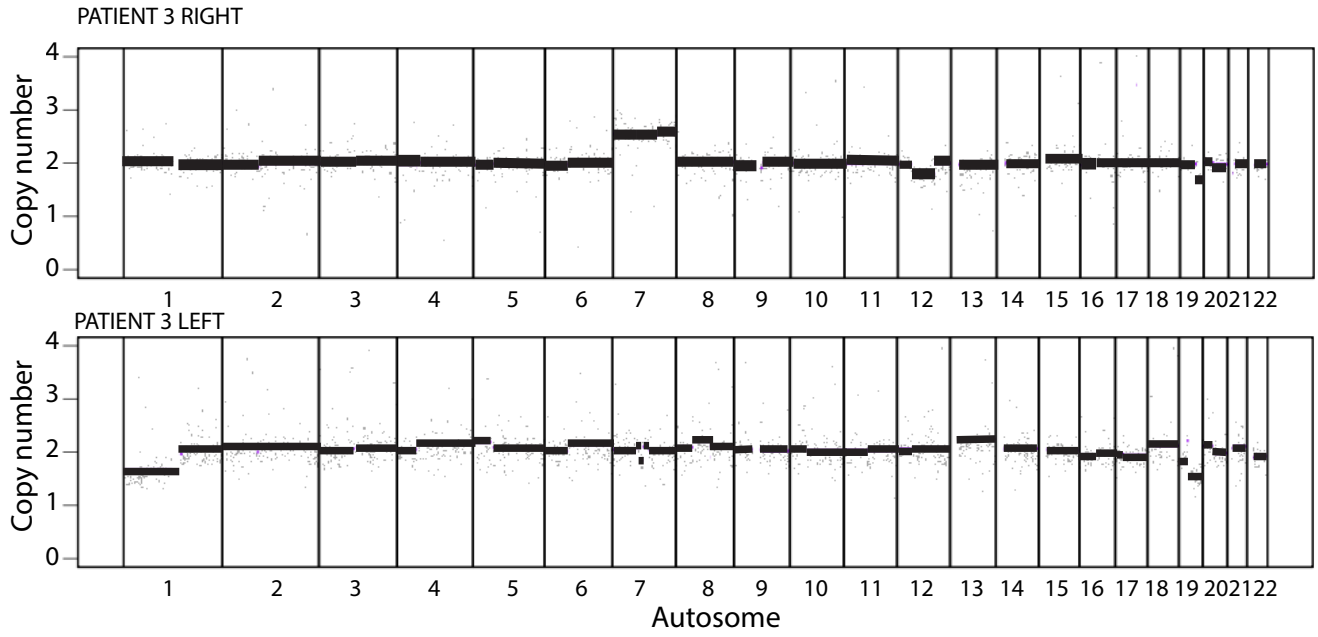

Supplement: nox205_suppl_supplementary_figs.pdf [file nox205_suppl_supplementary_figs.pdf]
